# Supplementary material
Source: PubMed Central journal article supplement (PMC4232713)
Supplement: NIHMS596807-supplement-1.pdf [file NIHMS596807-supplement-1.pdf]

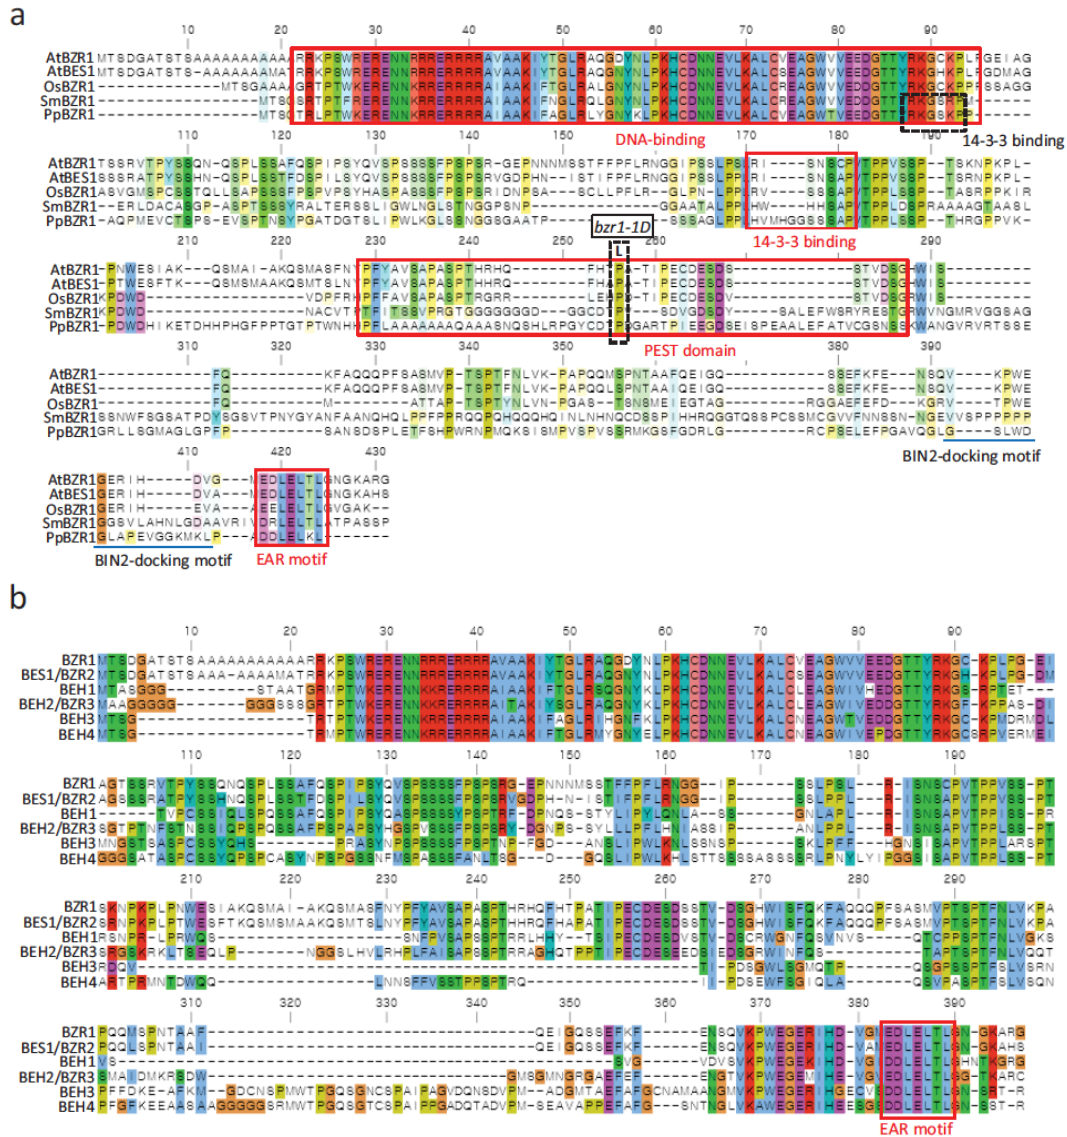

**Supplementary Figure 1.**

(a) Sequence alignment of BZR1 family of transcription factors in *Arabidopsis* (AtBZR1 and AtBES1), rice (OsBZR1), *Selaginella* (SmBZR1), and *Physcomitrella* (PpBZR1).  
 (b) Sequence alignment of BZR1 and its homologous proteins in *Arabidopsis*.

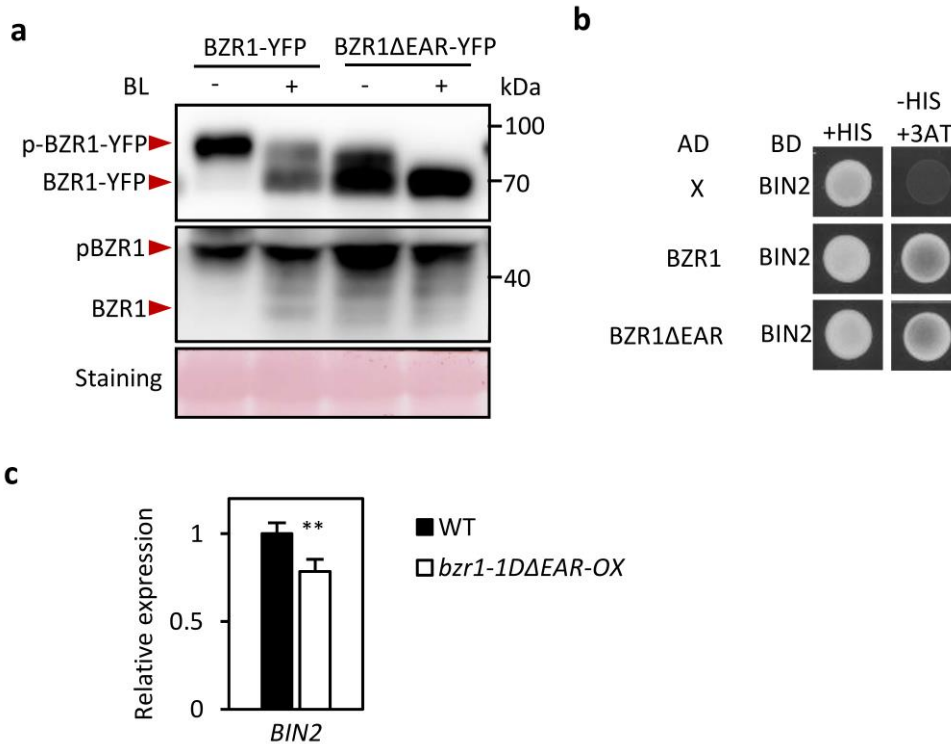

### Supplementary Figure 2.

(a) BZR1ΔEAR is partially dephosphorylated in the absence of BR signal. Seedlings were grown on the 2 μM PPZ medium for 5 days and then treated with mock or 100 nM BL for 1 hour. BZR1-YFP was detected by immunoblot using anti-GFP antibody and endogenous BZR1 was detected by immunoblot using anti-BZR1 antibody. Ponceau S staining is shown for loading control.

(b) Both BZR1 and BZR1ΔEAR interact with BIN2. Yeast clones were grown on the synthetic dropout (+HIS) or synthetic dropout without histidine (-HIS) plus 1mM 3AT medium. AD : activation domain fusion vector, BD : DNA binding domain fusion vector, x : empty vector.

(c) Expression levels of *BIN2* in the wild type and *bzr1-1DΔEAR-OX*. Seedlings were grown on the 2 μM PPZ medium for 5 days before harvesting for RNA extraction. Gene expression levels were normalized to that of *PP2A* and are shown relative to the expression levels in wild type. Error bars indicate the s.d. ( $n=3$ ). \*\*:  $P<0.01$  by Student's *t*-test.

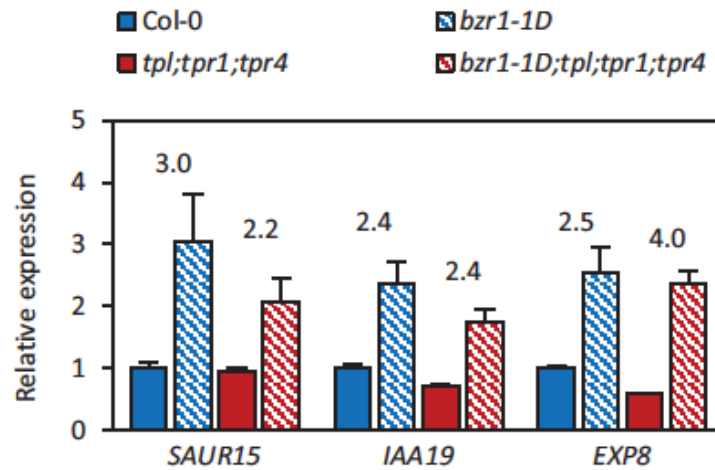

**Supplementary Figure 3.**

qRT-PCR analyses of BR-activated genes in the *tpl;tpr1;tpr4* triple mutant. Total RNA were extracted from etiolated seedlings grown on the medium containing 2  $\mu$ M PPZ. The relative gene expression levels were determined by qRT-PCR. Numbers indicate the ratios of expression levels (*bzip1-1D* / Col-0 or *bzip1-1D;tpl;tpr1;tpr4* / *tpl;tpr1;tpr4*). The error bars indicate the s.d. ( $n=3$ ).

Figure 4d

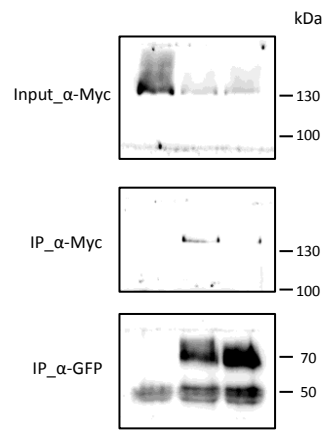

Figure 4e

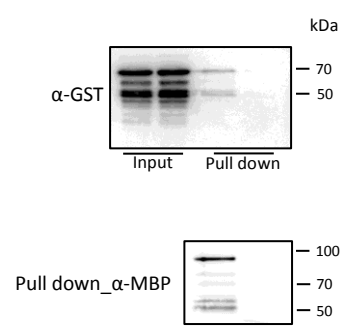

**Supplementary Figure 4.**  
Full scan of western blot images in Figures.

**Supplementary Table 1.** Primer list

| <b>qRT-PCR</b> |                            |                           |
|----------------|----------------------------|---------------------------|
| <b>Gene</b>    | <b>Forward</b>             | <b>Reverse</b>            |
| <i>PP2A</i>    | TATCGGATGACGATTCTTCGTGCAG  | GCTTGGTCGACTATCGGAATGAGAG |
| <i>SAUR15</i>  | AAGAGGATTCATGGCGGTCTATG    | GTATTGTTAAGCCGCCATTGG     |
| <i>IAA19</i>   | GGTGACAACTGCGAATACGTTACCA  | CCCGGTAGCATCCGATCTTTTCA   |
| <i>PRE1</i>    | GTTCTGATAAGGCATCAGCCTCG    | CATGAGTAGGCTTCTAATAACGG   |
| <i>PRE5</i>    | AACGGCGTCGTTCTGATAAG       | CATGAGTAAGCTTCTAATCACGG   |
| <i>PRE6</i>    | TCCAACACCTCATCCCTGAACTTCG  | CGGTCACTGAGGTCATCAACCTCTC |
| <i>CPD</i>     | TTGCTCAACTCAAGGAAGAG       | TGATGTTAGCCACTCGTAGC      |
| <i>DWF4</i>    | GGTGATCTCAGCCGTACATTTGGA   | CCCCACGTCGAAAACTACCACTTC  |
| <i>TPL</i>     | CCATCTCCTGTGAACAATCCACTGC  | CAAGAGGTGTTGGAACAGGTGACG  |
| <i>TPR1</i>    | GGACGGTTCCTATTCGGAGTTG     | :TTGCTTGTTCCGAGTGGAAAATGC |
| <i>TPR2</i>    | GGCACGAGGCACCAGTTTATTCC    | GTCCCGGTGCGTCATAATCAACC   |
| <i>TPR3</i>    | TGCTGGAGGAAAAGTCTCGTTGTTCC | AATGGCGATGACGTTATTGCCTGA  |

| <b>ChIP-PCR</b> |                            |                           |
|-----------------|----------------------------|---------------------------|
| <b>Gene</b>     | <b>Forward</b>             | <b>Reverse</b>            |
| <i>PP2A</i>     | CGGCTTTCATGATTCCCTCT       | GCCTTAAGCTCCGTTTCCTACTT   |
| <i>UBC30</i>    | CAAATCCAAAACCTAGAAACCGAA   | AACGACGAAGATCAAGAACTGGGAA |
| <i>TPL</i>      | AGTCATTGCCCTCAAGTTTGAC     | CGAGTTGAACATTTCTCCATCAC   |
| <i>TPR1</i>     | CCAAGTAGACATGATCCTCTGTGT   | TGTCGTGTTATGAGGGAAATGTG   |
| <i>TPR2</i>     | AAGTATCTCGTATTTCTCACGCTCTG | GATTTCGAAAAATGGAATTGAAGTG |
| <i>TPR3</i>     | AAGTTGATTTGGAGATAGAGTGGC   | AAACGAAGAGTGCATCGAAAGC    |

| <b>DNA pull-down</b> |                               |                                  |
|----------------------|-------------------------------|----------------------------------|
| <b>Gene</b>          | <b>Forward</b>                | <b>Reverse</b>                   |
| <i>DWF4</i>          | TCTTTGACCGCACGCTCGTGTAGGGGTCT | biotin- TAAACCTAACCAATGAGCTTCATG |
